# Supplementary figures and images for: Identification of Immune-Related Prognostic Markers in Gastric Cancer
Source: Hindawi journal article supplement (doi:10.1155/2022/7897274), 2022-03-08

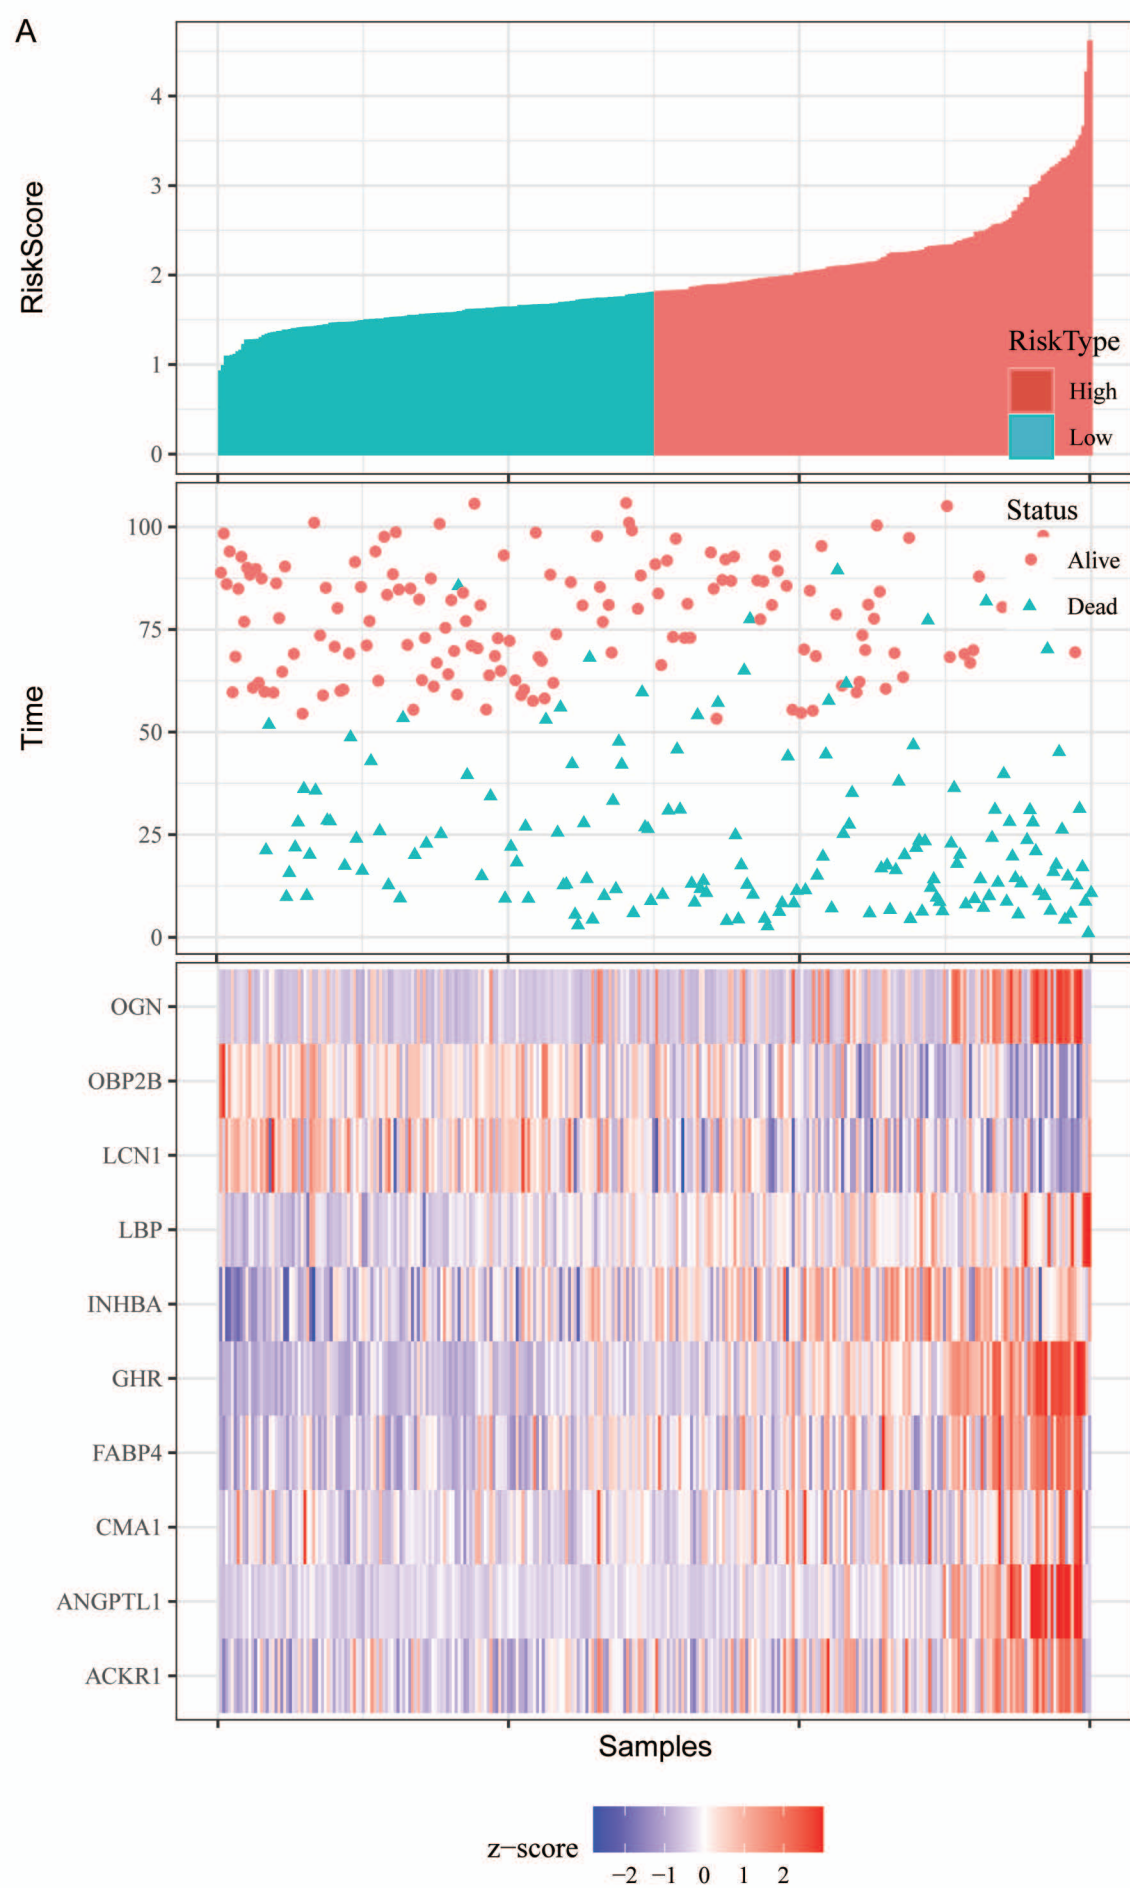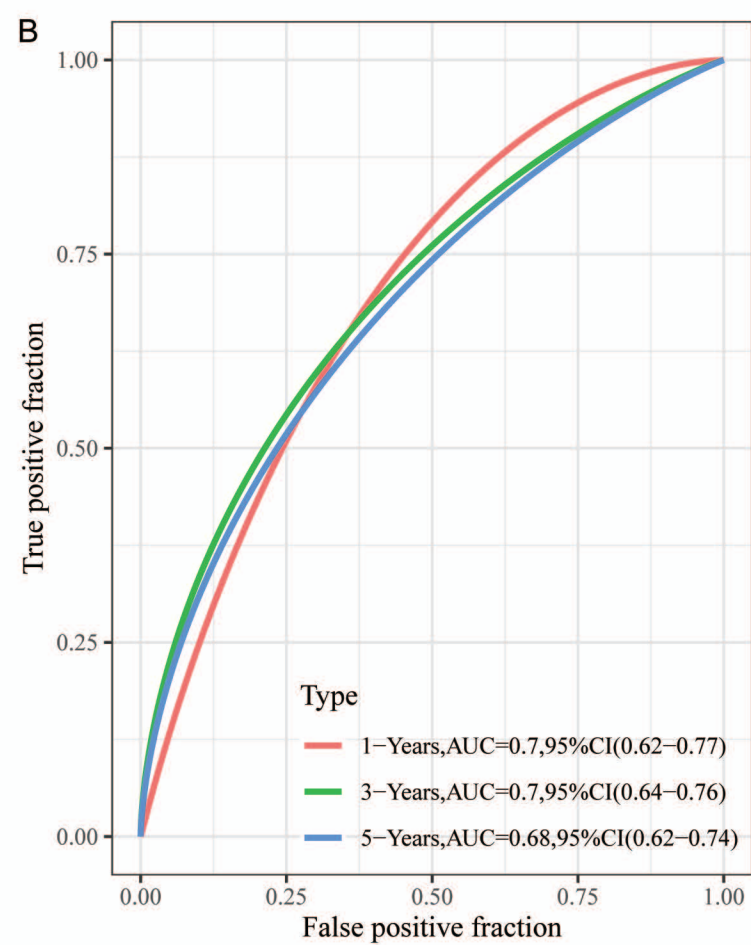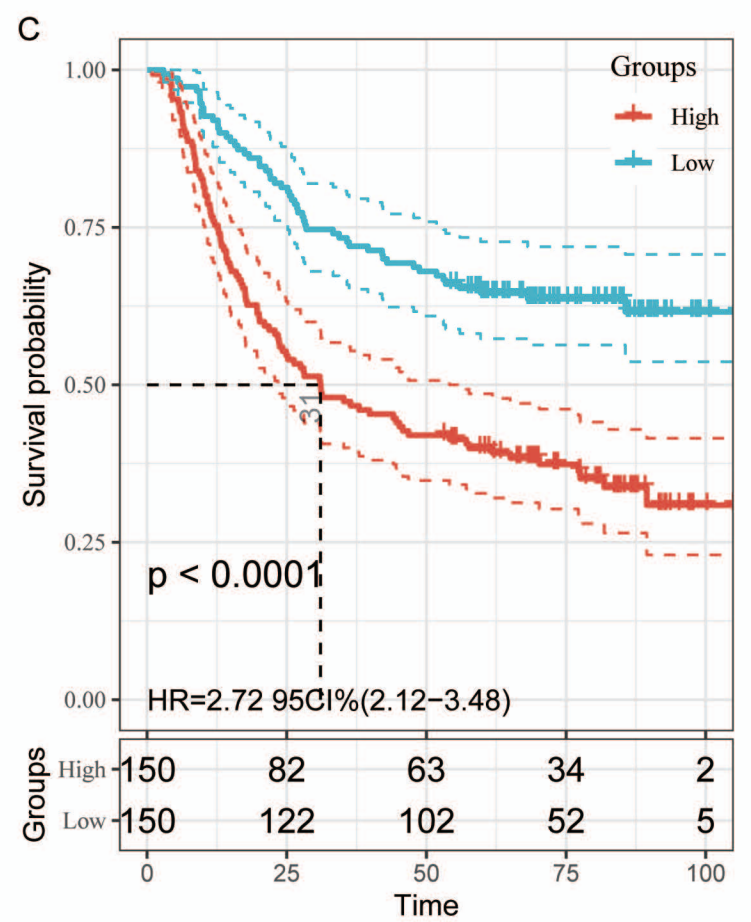

Supplement: f1 [file 7897274.f1.pdf]
